# Supplementary material for: Novel ATP2A2 Gene Mutation c.118G>A Causing Keratinocyte and Cardiomyocyte Disconnection in Darier Disease
Source: MDPI journal article supplement (doi:10.3390/biomedicines12051060), 2024-05-10
Supplement: s1 [file s1]

## SUPPORTING INFORMATION

**Supplementary Figure S1.** *List of the cardiac genes included in the next-generation sequencing clinical exome panel analyzed in this study.*

**Supplementary Figure S2.** *Integrative genomics viewer (Illumina) software visualization of the *ATP2A2* gene c.118G>A variant.*

**Supplementary Figure S3.** *In silico analysis of the *ATP2A2* c.118G>A variant using various splicing prediction programs.*

**Supplementary Figure S4:** *Further ultrastructural details of enlarged spaces and absence of contacts between myocytes in myocardium from Darier patient (B) as compared to the control (A).*

**Supplementary Figure S5:** *Western blot analysis of Serca-2*

**Figure S1.** List of the cardiac genes included in the next-generation sequencing clinical exome panel analyzed in this study.

*ABCC9, ACTC1, ACTN2, AKAP9, ALMS1, ANK2, ANKRD1, BAG3, BRAF, CACNA1C, CACNA2D1, CACNB2, CALM1, CALM3, CASQ2, CAV3, CHRM2, CRYAB, CSRP3, CTNNA3, DES, DMD, DOLK, DSC2, DSG2, DSP, DTNA, EMD, EYA4, FHL1, FKRP, FKTN, FLNC, GAA, GATA4, GATA6, GATAD1, GJA5, GLA, GNB5, GPD1L, HCN4, HFE, HRAS, ILK, JPH2, JUP, KCND3, KCNE1, KCNE1L, KCNE2, KCNE3, KCNJ2, KCNJ5, KCNJ8, KCNQ1, KRAS, LAMA4, LAMP2, LDB3, LMNA, MAP2K1, MAP2K2, MURC, MYBPC3, MYH6, MYH7, MYL2, MYL3, MYLK2, MYOZ2, MYPN, NEBL, NEXN, NKX2-5, NRAS, PDLIM3, PKP2, PLN, PRKAG2, PTPN11, RAF1, RANGRF, RBM20, RYR2, SCN10A, SCN1B, SCN2B, SCN3B, SCN4B, SCN5A, SGCD, SHOC2, SNTA1, SOS1, TAZ, TBX20, TCAP, TGFB3, TMEM43, TMPO, TNNC1, TNNI3, TNNT2, TPM1, TRDN, TRPM4, TTN, TTR, TXNRD2, VCL.*

Novel *ATP2A2* Gene Mutation c.118G>A Causing Keratinocyte and Cardiomyocyte Disconnection in Darier Disease.

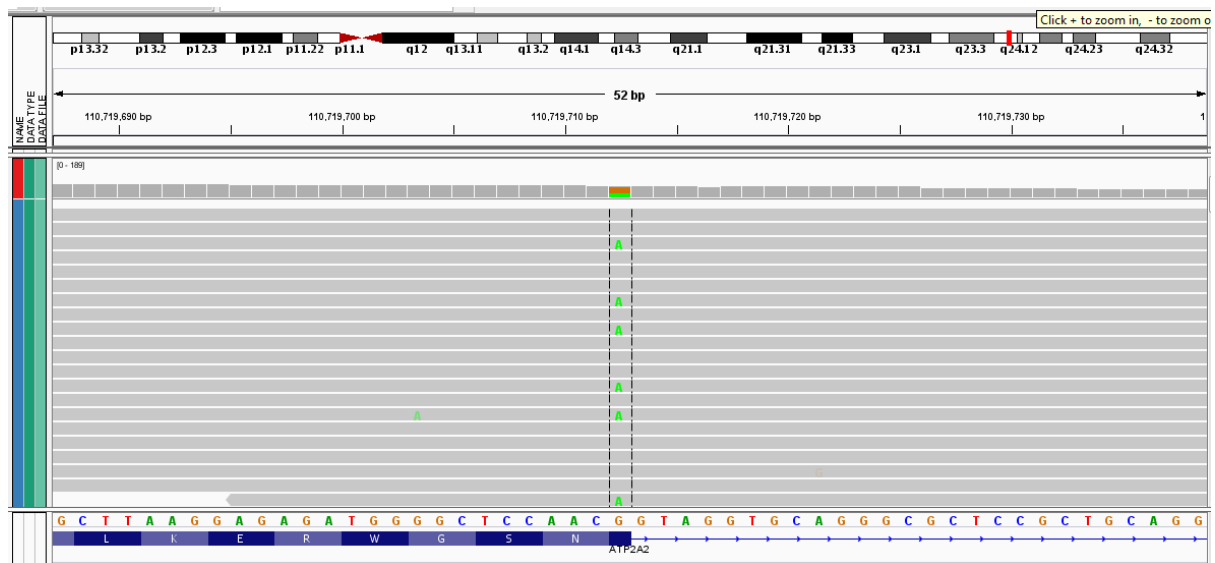

**Figure S2.** Integrative genomics viewer (Illumina) software visualization of the novel *ATP2A2* gene c.118G>A variant.

# Novel *ATP2A2* Gene Mutation c.118G>A Causing Keratinocyte and Cardiomyocyte Disconnection in Darier Disease.

| Alamut Visual Splicing Predictions                                                                                                  |                |                       |                      |                       |
|-------------------------------------------------------------------------------------------------------------------------------------|----------------|-----------------------|----------------------|-----------------------|
| Gene: <i>ATP2A2</i> - Transcript: NM_170665.3 - Variant: c.118G>A<br>Analysis range: c.19 (Exon 1) - c.118+100 (Intron 1) [199 bps] |                |                       |                      |                       |
| Donor Sites                                                                                                                         |                |                       |                      |                       |
|                                                                                                                                     | SSF<br>[0-100] | MaxEnt<br>[0-12]      | NNSPLICE<br>[0-1]    | GeneSplicer<br>[0-24] |
| Threshold                                                                                                                           | ≥ 70           | ≥ 0                   | ≥ 0.4                | ≥ 0                   |
| Exon 1 - c.24                                                                                                                       |                |                       |                      | = 4.90                |
| Exon 1 - c.33                                                                                                                       |                | = 2.64                |                      | = 4.21                |
| Exon 1 - c.61                                                                                                                       |                | = 2.65                |                      | 5.24 ⇒ 5.42 (-3.5%)   |
| Exon 1 - c.84                                                                                                                       | = 72.95        | = 2.98                |                      | 6.30 ⇒ 6.11 (-3.0%)   |
| Exon 1 - c.118 ■                                                                                                                    | 80.70 ⇒ —      | 10.15 ⇒ 5.67 (-44.1%) | 0.99 ⇒ 0.57 (-42.5%) | 11.12 ⇒ 7.89 (-29.0%) |
| Intron 1 - c.118+4                                                                                                                  |                | = 0.29                |                      | 0.67 ⇒ 1.85 (-177.0%) |
| Intron 1 - c.118+78                                                                                                                 |                |                       |                      | 1.10 ⇒ 0.91 (-17.9%)  |
| Natural Splice Site                                                                                                                 |                |                       |                      |                       |
| Acceptor Sites                                                                                                                      |                |                       |                      |                       |
|                                                                                                                                     | SSF<br>[0-100] | MaxEnt<br>[0-16]      | NNSPLICE<br>[0-1]    | GeneSplicer<br>[0-21] |
| Threshold                                                                                                                           | ≥ 70           | ≥ 0                   | ≥ 0.4                | ≥ 0                   |
| Intron 1 - c.118+5                                                                                                                  |                | 2.81 ⇒ 0.06 (-97.8%)  |                      |                       |
| Intron 1 - c.118+26                                                                                                                 | = 80.13        | = 3.23                | = 0.59               |                       |
| © Interactive Biosoftware - Created by Alamut Visual v2.11.0 on 17/10/2018                                                          |                |                       |                      |                       |

**Figure S3.** In silico analysis of the *ATP2A2* c.118G>A variant using various splicing prediction programs (Splice signal detection programs: SpliceSiteFinder-like [SSF], MaxEntScan [MaxEnt], NNSPLICE, and GeneSplicer) integrated in the Alamut software interface (Alamut version 2.10.0, Interactive Biosoftware, Rouen, France) showing the predicted consequences of c.954+1G>A variant at RNA level. *ATP2A2* c.118G>A mutation was predicted by all programs (SSF, MaxEnt, NNSPLICE, GeneSplicer) to severely decrease splicing efficiency of the donor site of exon 1 (SSF [-100.0%], MaxEnt [-44.1%], NNSPLICE [-42.5%], GeneSplicer [-29.0%]).

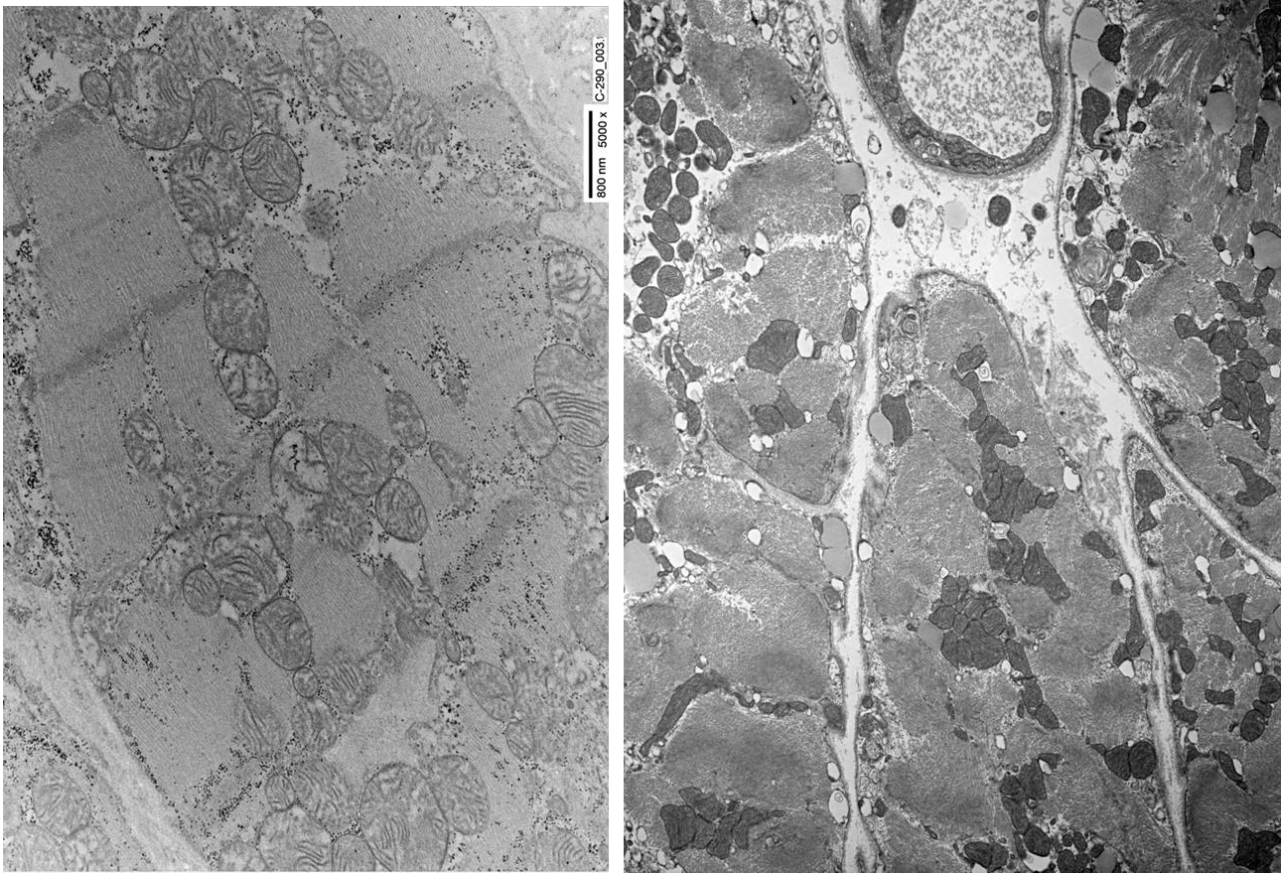

**Figure S4.** Further ultrastructural details of enlarged spaces and absence of contacts between myocytes in myocardium from Darier patient (B) as compared to the control (A).

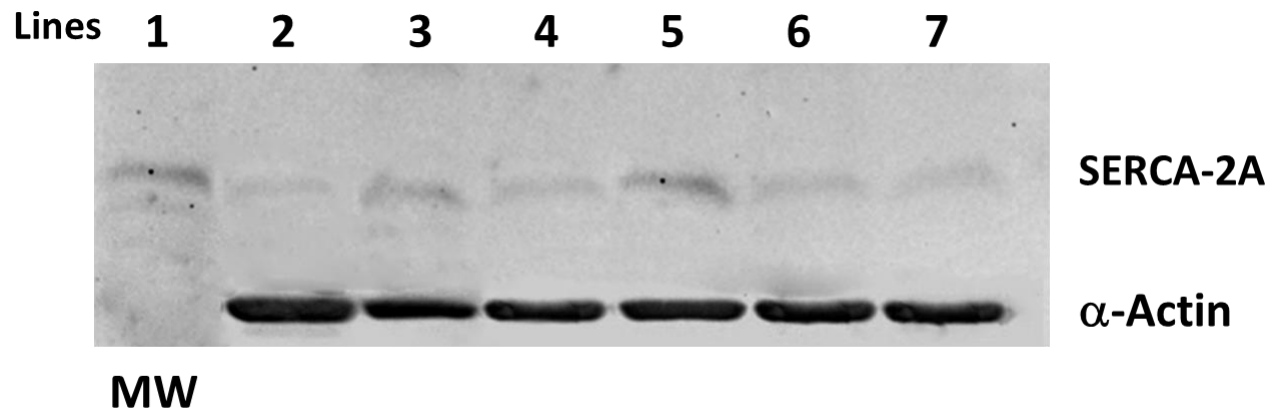

**Figure S5.** Upper: Western blot analysis of serca\_2 (110 Kd) shows no significant quantitative differences between patient (line2) and surgical control biopsies.(line 3-6). $p=0.106$ . Lower: Alpha sarcomeric actin (43 kDa) was used as a loading control. Line 1. Marker
